# Supplementary material for: The role of LEAP2 on cognitive impulsivity after refeeding: evidence from a preclinical study in female mice and from patients with anorexia nervosa
Source: Research Square preprint supplement (doi:10.21203/rs.3.rs-6854962/v1), 2025-06-18
Supplement: Supplementary file 1 [file 09e3063d1bc48bd863c4f681.pdf]

## Supplemental information

### Supplementary Material/Subjects and Methods

#### 1. Clinical study

##### 1.1. Participants

This study is part of an ongoing longitudinal study devoted to exploring the remission process in AN, registered under clinical trial N° NCT04560517. Our protocol has been described in our previous related publication<sup>1</sup>. Inclusion criteria were: female patients between 18 and 60 years old, with DSM-5 criteria of anorexia nervosa (AN). Thirty-two patients were included in a department specialized in eating disorders (CMME, GHU Paris Psychiatrie et Neurosciences). All participants included had three visits i/ the first visit (V1), in an undernourished state, performed in the first week after admission of inpatients, ii/ the second visit (V2) took place after four months of intensive care and before hospital discharge when participants reach a target body mass index ( $BMI > 19 \text{ kg/m}^2$ ) therefore being considered as in a refed state, iii/ the third visit (V3) took place six months after discharge with an evaluation of the remission status (still present *versus* lost). Stable remission status consisted of a maintained weight restoration 6 months after discharge ( $BMI > 18.5 \text{ kg/m}^2$ ) whereas early weight loss characterized unstable remission. The present study explored only behavioral and metabolic markers from the visit after weight restoration as well as the remission status. The visit consisted of a clinical evaluation which included the assessment of weight, BMI, a blood sample for metabolic explorations, and a psychiatric evaluation with assessment of AN subtype (Restrictive “AN-R”, or Binge Purge “BP”) and eating disorder symptoms with Eating Disorder Inventory, EDI-2<sup>2</sup>. The French version of the EDI-2 was used to assess symptoms severity and different clinical dimensions of AN: drive for thinness, bulimia, body dissatisfaction, ineffectiveness, perfectionism, interpersonal distrust, interoceptive awareness, maturity feat, ascetism, impulse regulation and social insecurity. The impulse regulation subscale was added to the later EDI-2 version to reflect the ability to regulate impulsive behavior, especially the binge behavior.

## 1.2. Blood collection

Blood was collected at each visit after an overnight fast on Vacutainer tubes treated with EDTA and Aprotinin (Cat#454261, Greiner Bio One SAS, Courtaboeuf, France). After collection, blood was kept at 4°C before centrifugation within 2h (1000xg for 10 min at 4°C). Plasma was aliquoted and one aliquot was immediately acidified with HCl (final concentration of 0.1N). Samples were stored at -80°C at Centre de Ressources Biologiques (CRB) of GHU Paris Psychiatrie et Neurosciences and assayed within 6 months.

## 2. Preclinical study

### 2.1. Food Restriction and refeeding protocol

To evaluate the impact of chronic food restriction on cognitive impulsivity in rodents, we used a progressive food restriction procedure adapted from the Food Restriction and Wheel protocol<sup>3</sup>. Animals were acclimatized in the facilities for a week. Then, mice and their food intake were weighted daily. Baseline food intake per cage was calculated as a mean of daily food intake on the past 5 days and considered as *ad libitum* food intake. Body weight on that day was also considered as *ad libitum* body weight.

Two experiments were performed (Figure 1A). For both experiments, mice were randomized in different groups. There were two groups of 8 animals in **experiment 1**: control group (CT) and food restricted group (FR); and three groups of 10-12 animals in **experiment 2**: control group, food restricted group and food restricted + refeeding group (FR + R). Animals were placed under mild food restriction to enhance motivation for reward and to allow the learning of the DDT task with a target at 85-90% of the *ad libitum* body weight. Food was delivered daily around 5:00 PM as individual pellets of similar weight to avoid competition between mice. The mice of the control group were submitted to the mild food restriction until the end of the protocol. Mice of the FR group were exposed to a 50% calorie restriction of their *ad libitum* food intake for 15 days. For the **experiment 2**, mice of the FR+R group were refed with *ad libitum* access to the food during 10 days after the food restriction described above.

Mice were housed two per cage to limit stress for behavioral tests. All animals were exposed to a mild food restriction during 25 to 35 days of training to the delay discounting task (DDT) and the first test (DDT1) was used as a baseline evaluation of the individual discounting. Then, the FR group was submitted to 15 days of food restriction as previously described during which all animals had a session of magnitude discrimination training every three days to maintain task acquisition. After the 15 days, CT and FR group performed a second DDT test (DDT2) to assess the impact of food restriction on cognitive impulsivity. Finally, animals of the CT and FR groups have performed a reversal learning test. All animals were sacrificed at the end of the protocol to collect brain and blood samples.

## **2.2. Delay discounting task for rodents**

### **2.2.1. Experiments**

**Experiment 1.** Mice were housed two per cage to limit stress for behavioral tests. All animals were exposed to a mild food restriction until the first test (DDT1) that was used as a baseline evaluation of the individual discounting. After the 15-day food restriction, CT and FR group performed a second DDT test (DDT2) to assess the impact of food restriction on cognitive impulsivity. Finally, animals of the CT and FR groups have performed a reversal learning test. All animals were sacrificed at the end of the protocol to collect brain and blood samples.

**Experiment 2.** Animals were housed 4-5 per cage. The procedure was similar than experiment 1, After baseline evaluation in DDT1 mice of the FR and FR+R groups were submitted first to food restriction as described above and the three groups were tested on DDT2, the mice of the FR group were then sacrificed to collect brain samples. Finally, mice of the CT and FR+R group were tested a third time (DDT3) after 10 days of refeeding (see previous section). All animals of CT and FR+R groups were sacrificed for brain and blood samples at the end of the protocol.

### **2.2.2. Apparatus**

Behavioral explorations took place in 8 operant chambers (MedAssociates® MED-008-CT-B3) on weekdays between 09:00 AM and 12:00 AM in a quiet room. Each chamber is protected from ambient noise and light being housed in an individual cabinet that is closed during the session. The operant wall contains three head entry detectors: two side holes and a central magazine where food is delivered in a food cup (Figure 1B). Target holes and food delivery are indicated with individual light cues. Liquid reward is delivered in the food cup through silicone tubing connected to a 10 mL syringe adapted on MedAssociates syringe pumps (motor speed = 3.33 rpm). We used a liquid reward mix of 1:1 strawberry flavored milk (commercially available) and strawberry flavored water added with natural sweetener (natural strawberry flavor 4g/l + Rebaudioside A 1,75g/l). This mix allowed a highly hedonic reward with limited caloric intake compared to pure strawberry flavored milk. The caloric intake was 285 kcal/L. Water was withdrawn from homecages 2 hours prior to the test to trigger motivation for liquid rewards. The DDT protocol has been designed thanks to David Fuller (engineer at K-Limbic) with the K-Limbic Software®.

### **2.2.3. Operant conditioning paradigm**

**Delay-discounting task.** We designed a delay-discounting task adapted from the literature (Mitchell, 2014). The animals performed one session of 40 minutes every day. During a session, the animal had to perform several trials involving a side hole choice and consumption of the corresponding reward. Two trials were separated with a 10 sec inter-trial interval (ITI), when all lights turned off (Figure 1C). The protocol was divided into 5 stages: 4 training stages and the test (Figure 1D).

- 1- **Habituation:** on the first day of food restriction, mice were placed in the operant chamber with 40  $\mu$ L of food reward dripping in the central magazine every 2 minutes to limit neophobia.
- 2- **Center nose poke learning:** animals were trained to poke in the central magazine to receive a reward of 40  $\mu$ L. Only pokes during the 20 sec illumination intervals were

reinforced. Success was determined if the animal could get 40 rewards per session on two successive sessions and could access the subsequent stage.

- 3- **Side pokes learning:** animals were then trained to activate side pokes and obtain the reward in the central magazine. Left and right pokes were active during 20 seconds, indicated with a light cue and a head poke in one of the side holes delivered a 40  $\mu$ L reward in the food cup indicated by the illumination of the central magazine for a maximum of 3600 seconds before a 10 seconds ITI. This stage permitted to evaluate the lateralization bias of each animal. We determined the baseline side preference considered as the side with the maximum number of pokes per session. Success was determined if the animal could get 40 rewards per session on two successive sessions and could access the subsequent stage.
- 4- **Magnitude discrimination:** this stage was like the previous one except one side was rewarded with a small (20  $\mu$ L) reward and the other with a large (60  $\mu$ L) reward. The small reward side was the preferred side determined with the baseline side preference to limit bias. The large reward side stayed the same until the end of testing. Magnitude discrimination was determined when animals chose the large reward in more than 80% of the trials per session in two successive sessions with an inter-session variance under 10%.

After training, testing consisted of a 5-day protocol. The large reward was delivered with an increasing delay each day (0 sec, 5 sec, 10 sec, 20 sec, 40 sec) and the small reward remained delivered immediately. Animals had to choose between a “Small Soon” reward (SS) and a “Large Late” reward (LL) as represented in Figure 1C-D.

The following behavioral components were recorded:

- Completed trials: trials containing a side poke during the 20 sec active phase followed by central food retrieval in the 3600 sec active phase (correct + incorrect trials).
- Correct trials: LL choice
- Incorrect trials: SS choice

- Omitted trial: no side poke or no central magazine poke during active phases.
- Perseverative pokes: side pokes during food delivery and central magazine activity.
- Latency to poke: latency to poke in the SS or LL side poke in the 20 sec of illumination of both side-pokes.

**Reversal learning task.** In experiment 1, we added a reversal learning task to evaluate the consequences of chronic food restriction on cognitive flexibility.

The day after the DDT test, animals were exposed to a simple fixed-ratio operant conditioning task in which the side hole associated with the large reward was rewarded with a 40  $\mu$ L reward (1 poke for 1 reward) and the opposite side was not rewarded anymore. We verified that mice learned the new rules and reached the success criterion of 75% of successful trials with a poke on the rewarded side for two consecutive sessions.

After the DDT, animals were exposed to a Fixed-ratio 1 (FR1) in the same apparatus as previously. Only the LL side remained rewarded with the delivery of 40 $\mu$ L of milk. Mice performed one session per day. A session lasted 40 minutes or stopped after 60 successful trials. Mice has to reach a criterion of 75% of successful trials (poke in the rewarded hole) for two consecutive sessions before moving to the reversal trial. For the reversal trial, the rewarded hole and the non-rewarded hole were reversed.

**Behavioral data analyses.** Temporal discounting is calculated as the rate at which the subjective value of the reward decreases with larger delays. Delay discounting was assessed using the % LL/LL+SS criteria for each delay during the block session. The preference for the LL option was calculated as the percentage of choice for the large option compared to the number of completed trial during the session for each delay.

We integrated the interindividual differences on the magnitude discrimination estimated as the % LL/LL+SS without delay (delay of 0 sec). We therefore calculated the percentage of decrease of the preference using the preference with the delay of 0 sec as baseline. The preference decrease for the delay (x) was calculated as the decrease between the preference

for the LL option when the delay (x) was applied versus the baseline preference for the LL option when no delay was applied.

Each delay was associated with a preference expressed as a percentage for each animal. Hyperbolic model is the most reliable criteria to interpret data from a delay discounting test <sup>35</sup>. We therefore tried to apply a similar model to preclinical data to facilitate the design of translational protocols that could use similar math to calculate discounting parameter. We determined a discounting parameter ( $k_{DD}$ ) for each animal, calculated from a hyperbolic model applied to the % LL choice as a function of delay curve using the following formula:

$$\% \text{ LL choice} = \frac{100}{1 + k_{DD} * \text{delay (s)}}$$

The discounting parameter was calculated as the best-fit value in a non-linear curve fit model and was determined for each animal at each DDT test session.

Motor impulsivity was evaluated through the number of perseverative pokes during the delay and the latency to poke for the large or the small reward, expressed in seconds.

For the reversal learning, we calculated the percentage of correct trials as the number of rewarded pokes on total number of side pokes. The number of trials increased during the reversal learning task.

## **2.4 Sample collection for metabolic explorations**

Brain tissue biopsies from hypothalamus, nucleus accumbens (NAc), dorsal striatum (DS) and prefrontal cortex (PFC) were collected from fresh brains using a micropunch. Blood was collected at sacrifice from trunk blood on an EDTA-coated tube supplemented with PHMB (p-hydroxymercuribenzoic acid), a cysteine protease inhibitor, at 0.4 mM final concentration in blood. Samples were kept on ice and centrifuged at 4°C (1000 g for 10 min) to collect plasma. Two aliquots of plasma were prepared: one aliquot was immediately acidified with HCl (0.1N final concentration) to preserve ghrelin stability then frozen on dry ice and the second aliquot

was frozen directly without acidification. Plasma samples were then stored at -80°C until assays.

## **2.5 RT-qPCR analyses**

Total RNA was extracted using Trizol reagent (Invitrogen Life Technologies, Thermo Fisher Scientific, Waltham, USA) and cDNA was obtained from reverse transcription of 1 µg of total RNA. A RQ1 DNase step (Promega France, Charbonnières-les-Bains) was performed on total RNA before reverse transcription with High Capacity cDNA Reverse Transcription Kit (Applied Biosystems, Foster City, CA, USA). Quantitative real-time PCR was performed using SYBR Green technology (LightCycler® 480 SYBR Green I Master (Roche Diagnostics, Meylan, France) or PowerTrack SYBR Green (Applied Biosystems, Foster City, CA, USA) on the LightCycler 480 system (Roche Diagnostics, Meylan, France). Target genes were Agouti-related Protein (*AgRP*), Neuropeptide Y (*NPY*), Proopiomelanocortin (*POMC*), Growth Hormone Secretagogue Receptor (*GHSR*), Leptin receptor (*LepR*) as well as dopamine receptors *DRD1* and *DRD2*. The comparative  $\Delta\Delta C_t$  method, where  $C_t$  is the threshold cycle at which amplified PCR product was detected, was used to assess the relative expression of the target genes normalized to the *Ppia* transcript (housekeeping gene). All Primers sequences are available upon demand.

## **3. ELISA immunoassays**

Plasma concentration of acyl ghrelin (AG) was evaluated with specific enzyme-immunoassay kits (Cat#A05106 for human, CA#A05117 for mouse/rat, Bertin Bioreagents, Montigny le Bretonneux, France). All used samples came from acidified aliquot as acidification is known to preserve ghrelin stability. External quality control of the same mice and human plasma was respectively used in all assays to ensure inter-assay stability. Intra- and inter- assay coefficients of variation were <9% and <16% respectively in humans, 7% and 8% in mice. Plasma concentrations of LEAP2 were measured with enzyme-immunoassay kit (Cat#EK-075-40, Phoenix Pharmaceuticals, Burlingame, USA). The commercial kit used here recognizes both mouse and human LEAP2, i.e. LEAP2 (38-77) (Human) / LEAP2 (37-76) (Mouse) (100%



cross-reactivity). External quality control of the same human plasma was respectively used in all assays to control inter-assay variation. Intra- and inter-assay coefficient of variation were respectively <10% and <15%. Concentrations were transformed in pmol/L and the Ghrelin/LEAP2 molar ratio was calculated using molar ratio.

## References

1. Tezenas du Montcel C, Duriez P, Cao J, Lebrun N, Ramoz N, Viltart O *et al*. The role of dysregulated ghrelin/LEAP-2 balance in anorexia nervosa. *iScience* 2023; 107996.
2. Garner DavidM. EDI-2: Eating Disorder Inventory-2. *Odessa Psychol Assess Ressour* 1991.
3. Méquinion M, Chauveau C, Viltart O. The use of animal models to decipher physiological and neurobiological alterations of anorexia nervosa patients. *Front Endocrinol* 2015; **6**: 68.

## Supplementary Figures and Tables

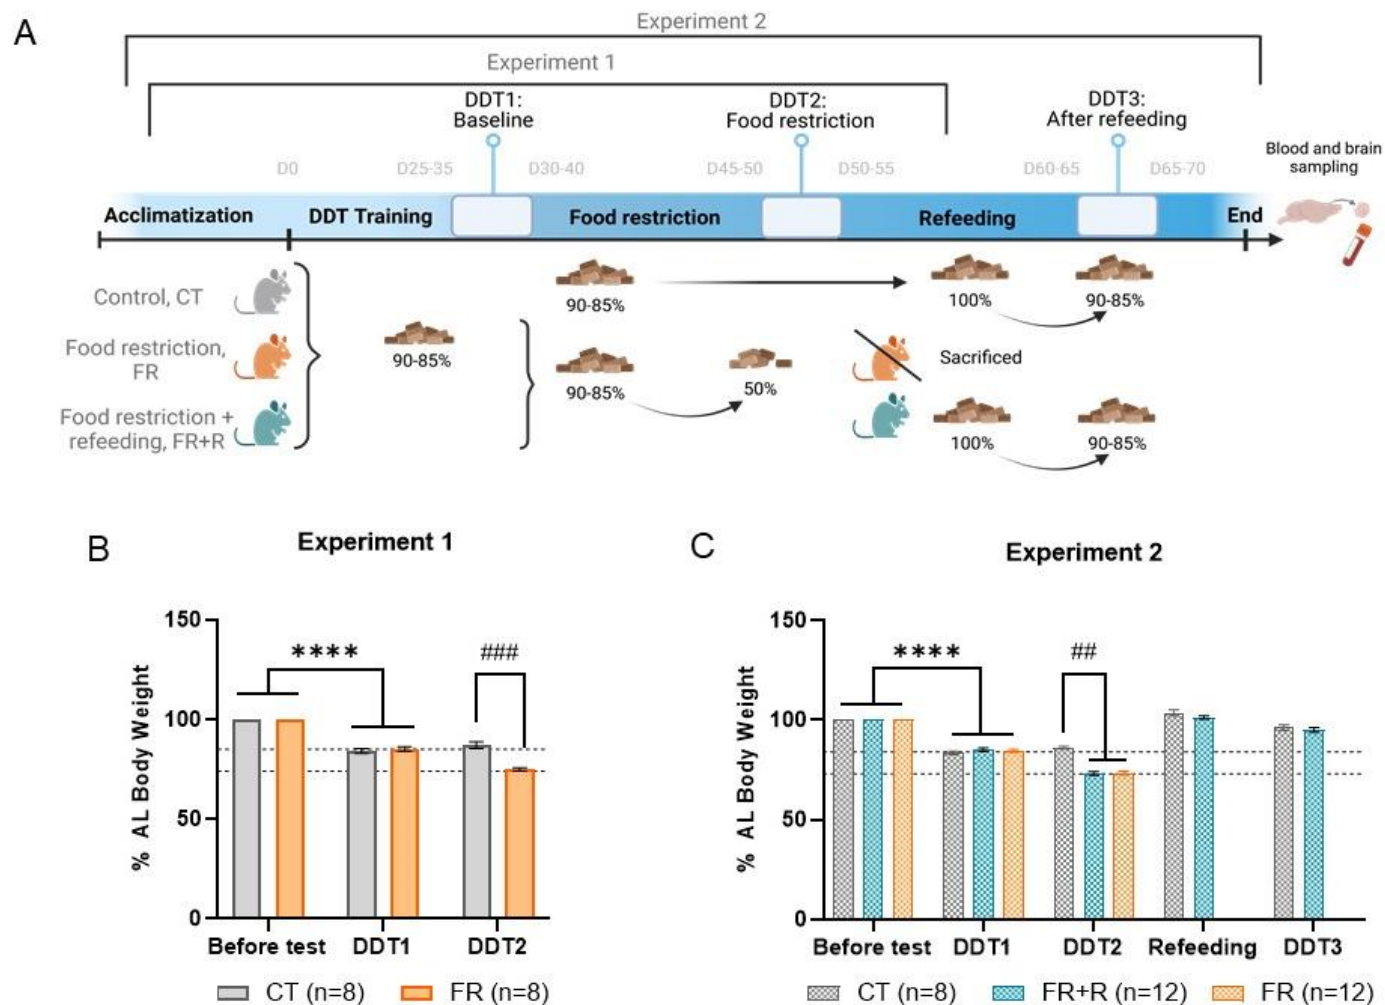

**Fig S1. Schematic representation of the experiments and body weight changes. A**

Timeline of the experiment and representation of the three experimental groups (Designed with Biorender). **B-C** Percentage of *ad libitum* body weight during DDT tests in experiment 1 (B) and 2 (C). Mild food restriction leads to similar weight loss in DDT1 but FR mice exhibit decreased body weight compared to CT mice in DDT2. **C** Evolution of body weight in experiment 2 after food restriction for FR and FR+R groups in DDT2. Data are expressed as mean  $\pm$  sem. Within group comparisons \*\*\*\* $p < 0.0001$ ; Between group comparison ## $p < 0.01$ , ### $p < 0.001$ . CT: control, DDT: delay discounting task, FR: food restriction, FR+R: food restriction + refeeding, RM: repeated measures.

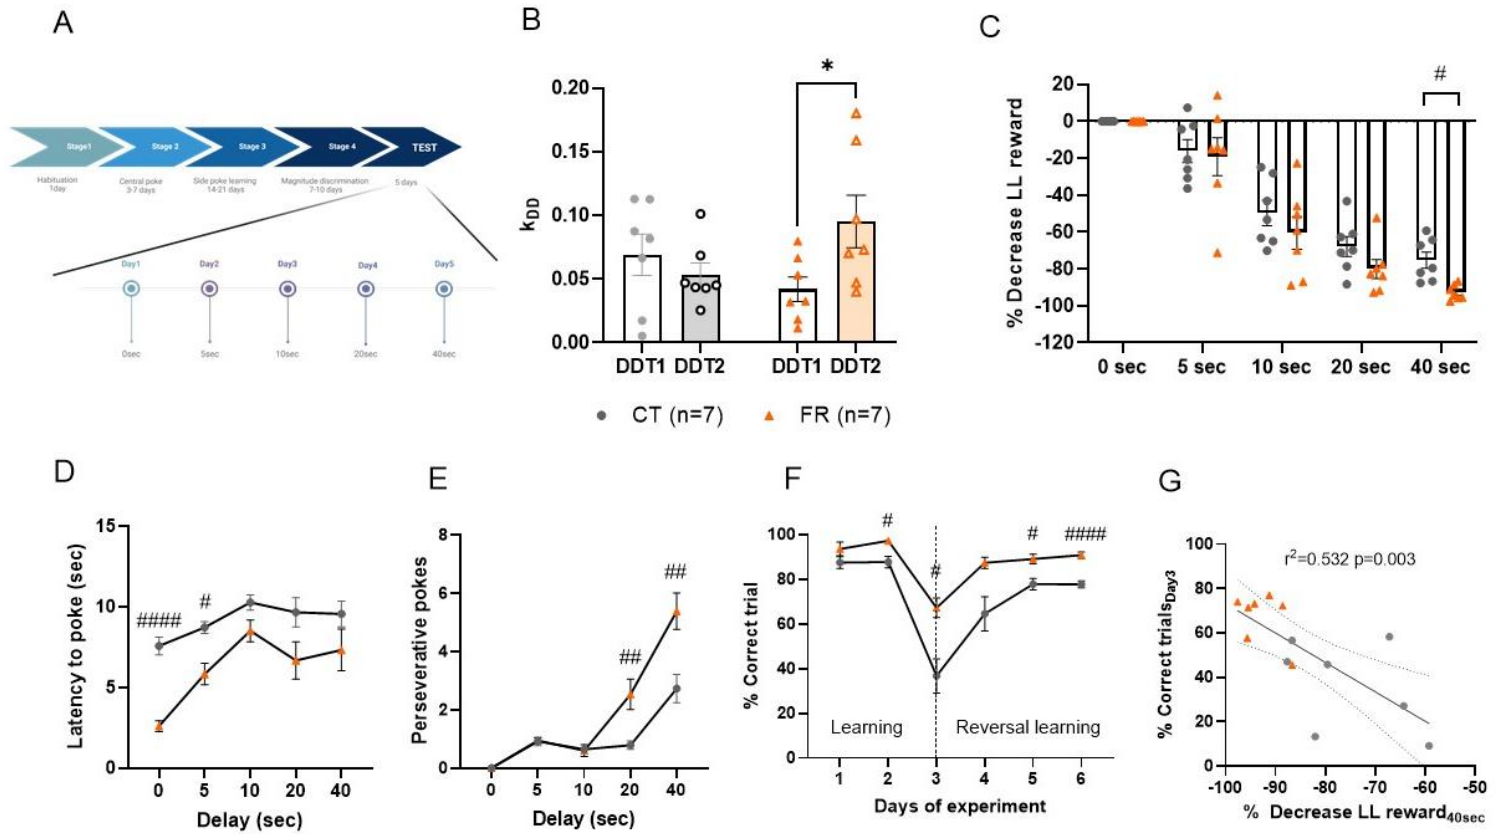

**Fig S2. Description of the training stages and the DDT phases and behavioral exploration in food restricted mice in experiment 1.** **A** Schematic representation of training and testing in the DDT paradigm (Designed with Biorender). **B** Devaluation coefficient ( $k_{DD}$ ) based on a hyperbolic model in FR compared to CT mice. **C** Preference for the larger reward with increasing delays (5 to 40 sec) in FR compared to CT mice. **D** Motor impulsivity evaluated with the latency to poke for the LL reward in FR compared to CT mice. **E** Number of perseverative pokes in the LL side in FR compared to CT mice. **F** Number of correct trials during the reversal learning stage in FR compared to CT mice. **G** Simple linear correlation between the percentage of correct trials on day 3 of the RL task and the percentage decreased choice for the LL reward on the 40-sec delay in DDT2. Data are expressed as mean  $\pm$  sem. Within group comparison: \* $p < 0.05$ . Between groups comparison: # $p < 0.05$ , ## $p < 0.01$ , #### $p < 0.0001$ . RM: repeated measures, RL: Reversal Learning,  $n = 7$  mice per group. DDT: Delay Discounting Task, CT: Control, FR: Food Restriction,  $k_{DD}$ : Devaluation coefficient, LL: Large Late (delayed gratification).

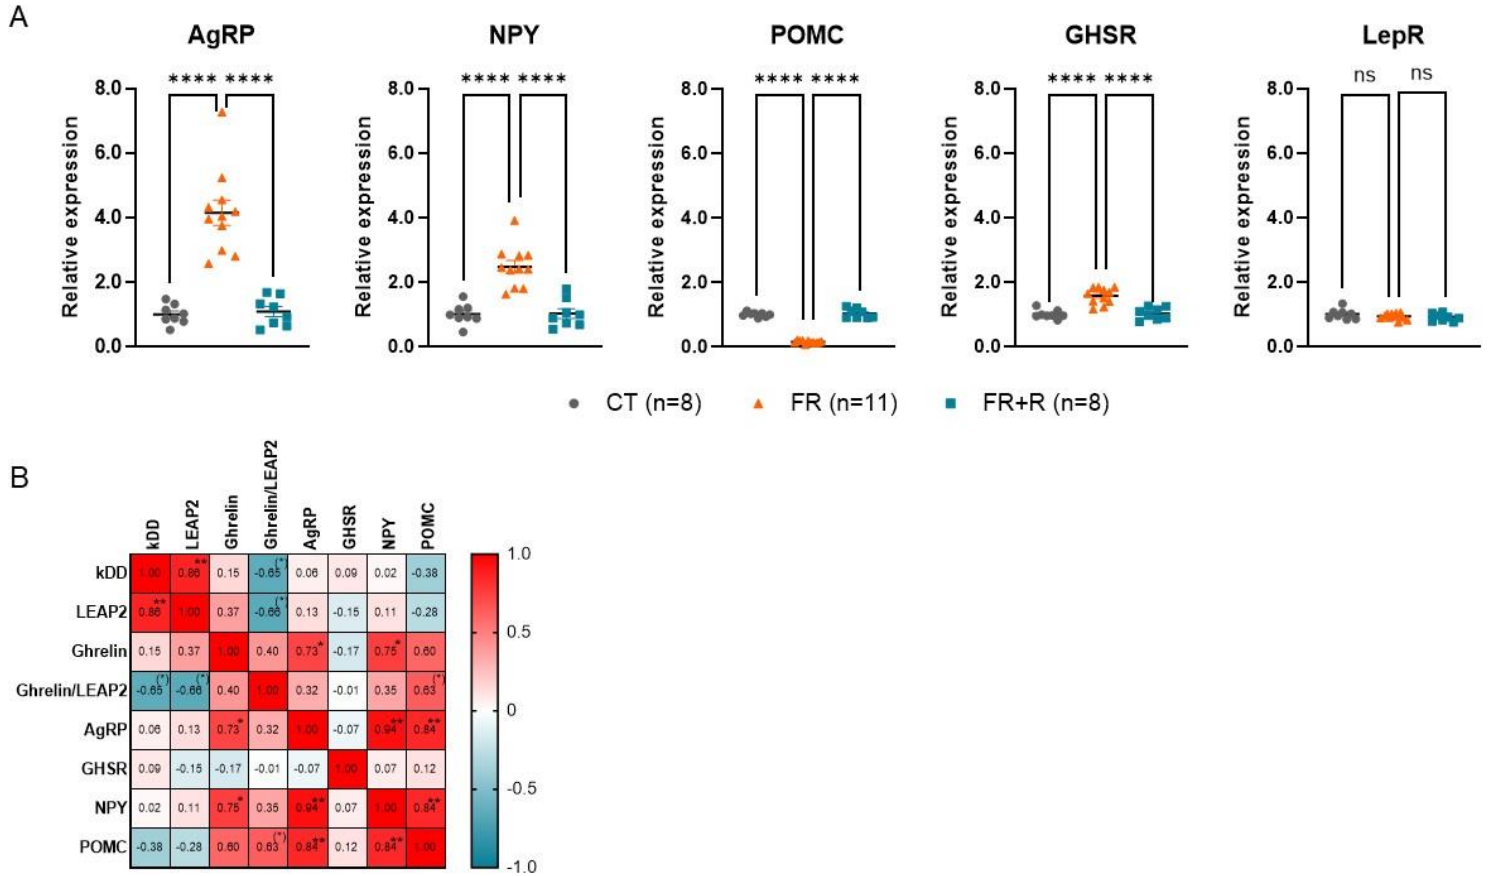

**Fig S3. Expression of hypothalamic biomarkers of the nutritional status in CT, FR and FR+R conditions and correlation matrix in FR+R conditions.** **A** Expression of hypothalamic AgRP, NPY, POMC, GHSR and and LepR in CT, FR and FR+R mice. **B** Correlation matrix between  $k_{DD}$ , plasma levels of LEAP2, ghrelin, ghrelin/LEAP2 ratio and gene expressions of hypothalamic genes in the FR+R group (See also Table S4 for  $r$  and  $p$ -value). Data are expressed as mean  $\pm$  sem. \*\*\*\* $p < 0.0001$ . AgRP: Agouti Related Protein, CT: Control, FR: Food Restriction, FR+R: Food Restriction + Refeeding, GHSR: Growth Hormone Secretagogue Receptor,  $k_{DD}$ : Devaluation coefficient, LEAP2: Liver Expressing Antimicrobial Peptide 2, LepR: Leptin receptor, NPY: Neuropeptide Y, POMC: Proopiomelanocortin.

Food Restricted + Refed (n=8)

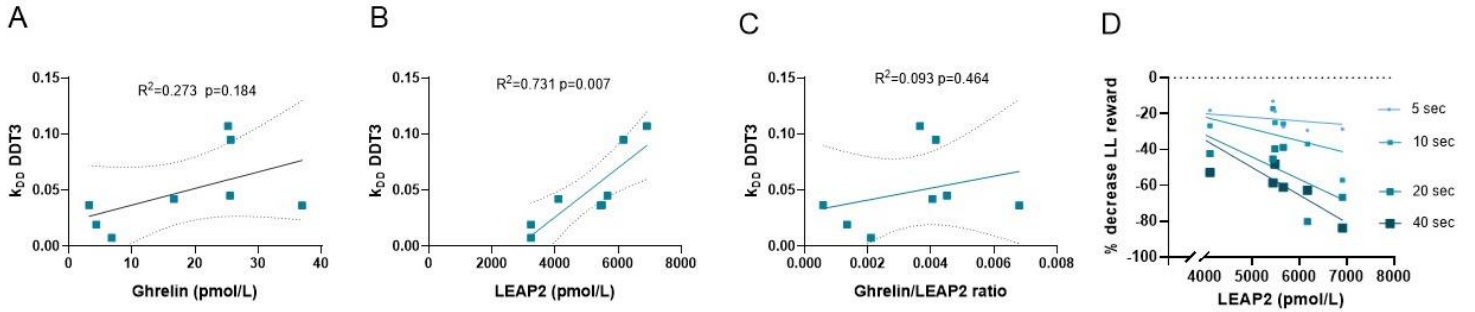

**Fig S4. Correlation between the devaluation coefficient  $k_{DD}$  and plasma levels of ghrelin, LEAP2 and ghrelin/LEAP2 ratio in FR+R conditions. A-C:** Simple linear regression between the devaluation coefficient ( $k_{DD}$ ) on DDT3 and plasma levels of ghrelin (A), LEAP2 (B), and ghrelin/LEAP2 molar ratio (C) in refed animals. **D** Simple linear regression between plasma levels of LEAP2 and the percentage decreased preference for the LL reward on DDT3. Data are expressed as coefficient of determination ( $r^2$ ) and p-value. Dotted lines represent the 95% confidence band of the best fit line. CT: control, DDT: delay discounting task, LL: Large Late, FR: food restriction, FR+R: food restriction + refeeding, LEAP2: Liver Expressed Antimicrobial Peptide 2,  $k_{DD}$ : Coefficient of devaluation. Correlation performed with simple (A-C) or multiple (D) linear regression.

**Food Restricted + Refed (n=7-8)**

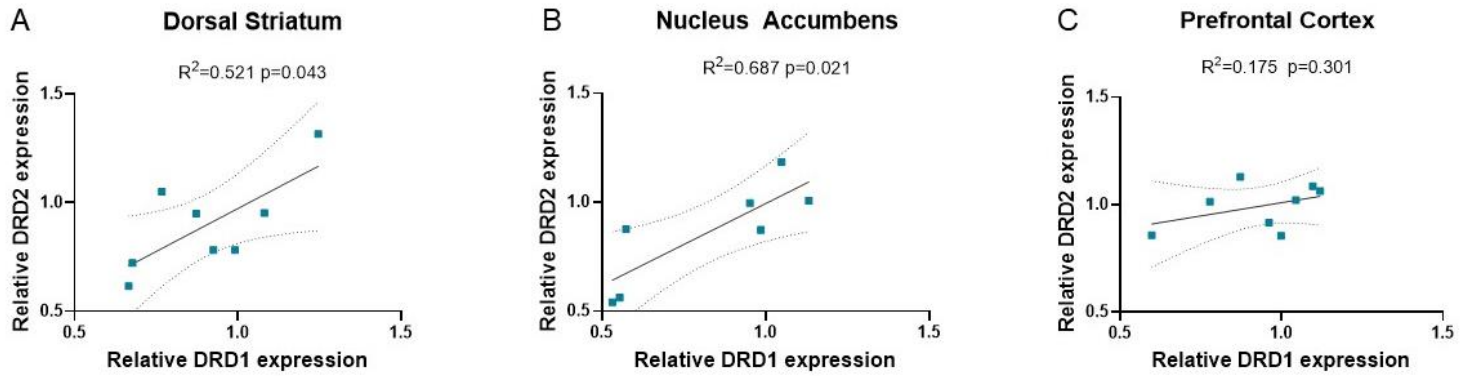

**Fig S5. Correlation between the expression of DRD1 and DRD2 in brain structures of the cortico-striatal network in FR+R conditions.** Simple linear regression in the dorsal striatum (A), nucleus accumbens (B) and prefrontal cortex (C). Data are expressed as coefficient of determination ( $r^2$ ) and p-value. Dotted lines represent the 95% confidence band of the best fit line. DRD1: dopamine receptor type 1, DRD2: dopamine receptor type 2.

| <b>Descriptive statistics</b> | All (n=30)      | Stable remission (n=14) | Unstable remission (n=16) | Statistical test, p-value |
|-------------------------------|-----------------|-------------------------|---------------------------|---------------------------|
| Age (years)                   | 26.41±1.62      | 24.71±1.52              | 27.72±2.63                | U=120 p=0.829             |
| Subtype (AN-R/AN-BP)          | 25 (78%)/7(22%) | 10 (71%)/4(29%)         | 15 (83%)/3(17%)           | $\chi^2$ =0.653 p=0.419   |
| BMI (kg/m <sup>2</sup> )      | 20.02±0.081     | 20.22±0.091             | 19.84±0.115               | <b>U=54 p=0.014</b>       |
| EDI-2 score                   | 62.430±7.640    | 71.14±13.30             | 51.59±7.834               | U=93.50 p=0.321           |
| Impulse regulation            | 3.067±0.717     | 4.429±1.217             | 2.000±0.725               | U=80 p=0.178              |
| Ghrelin (pmol/L)              | 21.35±3.80      | 18.43±5.55              | 23.90±5.29                | U=79 p=0.179              |
| LEAP2 (pmol/L)                | 3160±297        | 3195±437                | 2946±395                  | U=117 p=0.750             |
| Ghrelin/LEAP2 molar ratio     | 0.007±0.001     | 0.006±0.001             | 0.008±0.001               | U=114 p=0.659             |

**Table S1. Descriptive statistics of the population of the cohort study after weight restoration.** Data are expressed as mean ± SEM. Mann Whitney paired t-test and  $\chi^2$  test, p<0.05 considered significant. AN: Anorexia Nervosa, AN-R: Anorexia Nervosa Restrictive-type; AN-BP: Anorexia Nervosa\_Bingeing/Purging-type, BMI: Body Mass Index, EDI-2: Eating Disorder Inventory 2, LEAP2: Liver Expressed Antimicrobial Peptide 2.

| Correlation with kDD      | Group                 | Experiment 1 Food restriction |        |
|---------------------------|-----------------------|-------------------------------|--------|
|                           |                       | CT                            | FR     |
| Ghrelin (pmol/L)          | <i>r</i>              | -0.642                        | 0.576  |
|                           | <i>r</i> <sup>2</sup> | 0.003                         | 0.331  |
|                           | <i>p-value</i>        | 0.697                         | 0.176  |
| LEAP2 (pmol/L)            | <i>r</i>              | -0.181                        | 0.391  |
|                           | <i>r</i> <sup>2</sup> | 0.413                         | 0.153  |
|                           | <i>p-value</i>        | 0.119                         | 0.386  |
| Ghrelin/LEAP2 molar ratio | <i>r</i>              | 0.169                         | 0.175  |
|                           | <i>r</i> <sup>2</sup> | 0.028                         | 0.031  |
|                           | <i>p-value</i>        | 0.718                         | 0.708  |
| % AL Body weight          | <i>r</i>              | -0.389                        | -0.343 |
|                           | <i>r</i> <sup>2</sup> | 0.150                         | 0.118  |
|                           | <i>p-value</i>        | 0.388                         | 0.452  |

**Table S2. Correlations between the devaluation coefficient ( $k_{DD}$ ), metabolic status plasmatic markers and body weight decrease in FR conditions.** Data are expressed as Pearson's *r* coefficient,  $r^2$  and *p*-value. AL: *Ad libitum*, CT: control, FR: food restricted,  $k_{DD}$ : devaluation coefficient, LEAP2: Liver Expressed Antimicrobial Peptide 2.



| Correlation matrix | kDD           |                | LEAP2         |                | Ghrelin      |                | Ghrelin/LEAP2 molar ratio |                | <i>AgRP</i>  |                | <i>GHSR</i> |                | <i>NPY</i>   |                |
|--------------------|---------------|----------------|---------------|----------------|--------------|----------------|---------------------------|----------------|--------------|----------------|-------------|----------------|--------------|----------------|
|                    | Pearson r     | <i>p-value</i> | Pearson r     | <i>p-value</i> | Pearson r    | <i>p-value</i> | Pearson r                 | <i>p-value</i> | Pearson r    | <i>p-value</i> | Pearson r   | <i>p-value</i> | Pearson r    | <i>p-value</i> |
| kDD                |               |                |               |                |              |                |                           |                |              |                |             |                |              |                |
| LEAP2              | <b>0.855</b>  | <b>0.007</b>   |               |                |              |                |                           |                |              |                |             |                |              |                |
| Ghrelin            | 0.150         | 0.723          | 0.375         | 0.360          |              |                |                           |                |              |                |             |                |              |                |
| Ghrelin/LEAP2      | <b>-0.647</b> | <b>0.083</b>   | <b>-0.659</b> | <b>0.076</b>   | 0.405        | 0.320          |                           |                |              |                |             |                |              |                |
| <i>AgRP</i>        | 0.061         | 0.885          | 0.127         | 0.765          | <b>0.726</b> | <b>0.0415</b>  | 0.320                     | 0.439          |              |                |             |                |              |                |
| <i>GHSR</i>        | 0.087         | 0.837          | -0.147        | 0.729          | -0.171       | 0.686          | -0.0131                   | 0.975          | -0.074       | 0.862          |             |                |              |                |
| <i>NPY</i>         | 0.024         | 0.955          | 0.111         | 0.794          | <b>0.751</b> | <b>0.032</b>   | 0.348                     | 0.398          | <b>0.939</b> | <b>0.001</b>   | 0.067       | 0.875          |              |                |
| <i>POMC</i>        | -0.379        | 0.354          | -0.283        | 0.497          | 0.595        | 0.119          | <b>0.630</b>              | <b>0.094</b>   | <b>0.843</b> | <b>0.009</b>   | 0.117       | 0.783          | <b>0.841</b> | <b>0.009</b>   |

**Table S3 (referring to Fig 2D). Correlation matrix between the devaluation coefficient  $k_{DD}$  and the expression of dopaminergic receptors DRD1 and DRD2 in the DS, NAc and PFC.** DS: dorsal Striatum, DRD1: Dopaminergic Receptor type 1, DRD2: Dopaminergic Receptor type 2,  $k_{DD}$ : devaluation coefficient, LEAP2: Liver expressed Antimicrobial Peptide 2, Nac: nucleus accumbens, PFC: prefrontal cortex. Data are expressed as Pearson's r coefficient and p-value.

| Correlation matrix | kDD           |              | LEAP2         |              | Ghrelin   |         | Ghrelin/LEAP2 molar ratio |         | DS DRD1      |              | DS DRD2   |         | NAc DRD1     |              | NAc DRD2  |         | PFC DRD1  |         |
|--------------------|---------------|--------------|---------------|--------------|-----------|---------|---------------------------|---------|--------------|--------------|-----------|---------|--------------|--------------|-----------|---------|-----------|---------|
|                    | Pearson r     | p-value      | Pearson r     | p-value      | Pearson r | p-value | Pearson r                 | p-value | Pearson r    | p-value      | Pearson r | p-value | Pearson r    | p-value      | Pearson r | p-value | Pearson r | p-value |
| kDD                |               |              |               |              |           |         |                           |         |              |              |           |         |              |              |           |         |           |         |
| LEAP2              | <b>0.855</b>  | <b>0.007</b> |               |              |           |         |                           |         |              |              |           |         |              |              |           |         |           |         |
| Ghrelin            | 0.150         | 0.723        | 0.375         | 0.360        |           |         |                           |         |              |              |           |         |              |              |           |         |           |         |
| Ghrelin/LEAP2      | <b>-0.647</b> | <b>0.083</b> | <b>-0.659</b> | <b>0.076</b> | 0.405     | 0.320   |                           |         |              |              |           |         |              |              |           |         |           |         |
| DS DRD1            | -0.602        | 0.114        | -0.391        | 0.338        | -0.149    | 0.725   | 0.163                     | 0.700   |              |              |           |         |              |              |           |         |           |         |
| DS DRD2            | -0.498        | 0.209        | -0.178        | 0.673        | 0.465     | 0.245   | 0.430                     | 0.289   | <b>0.722</b> | <b>0.043</b> |           |         |              |              |           |         |           |         |
| NAc DRD1           | -0.061        | 0.897        | 0.017         | 0.970        | -0.055    | 0.906   | -0.231                    | 0.617   | -0.239       | 0.606        | -0.306    | 0.504   |              |              |           |         |           |         |
| NAc DRD2           | -0.435        | 0.281        | -0.342        | 0.406        | -0.223    | 0.595   | 0.077                     | 0.856   | -0.087       | 0.837        | -0.306    | 0.460   | <b>0.829</b> | <b>0.021</b> |           |         |           |         |
| PFC DRD1           | <b>-0.685</b> | <b>0.061</b> | -0.340        | 0.410        | 0.123     | 0.772   | 0.226                     | 0.590   | 0.617        | 0.103        | 0.571     | 0.139   | 0.527        | 0.224        | 0.563     | 0.146   |           |         |
| PFC DRD2           | -0.436        | 0.280        | -0.112        | 0.792        | 0.405     | 0.320   | 0.442                     | 0.273   | 0.022        | 0.959        | 0.234     | 0.577   | 0.229        | 0.621        | 0.445     | 0.269   | 0.419     | 0.302   |

**Table S4 (referring to Figure S3B). Correlation matrix between k<sub>DD</sub>, plasma levels of LEAP2, ghrelin, and hypothalamic gene expression.**

AgRP: Agouti Related Protein, GHSR: Growth Hormone Secretagogue Receptor, k<sub>DD</sub>: devaluation coefficient, LEAP2: Liver expressed Antimicrobial Peptide 2; NPY: Neuropeptide Y, POMC: Proopiomelanocortin. Data are expressed as Pearson's r coefficient and p-value.
